# Supplementary material
Source: PubMed Central journal article supplement (PMC9880250)
Supplement: NIHMS1851561-supplement-1.pdf [file NIHMS1851561-supplement-1.pdf]

## Supplementary Case Report 1

The proband is a Polish 62-year-old right-handed man, without family history, who was diagnosed with a severe myopathy affecting proximal and distal muscles of the four-limbs and axial muscles. Muscle biopsy showed dystrophic changes associated with rimmed vacuoles. Genetic study identified a missense pathogenic variant, c.271A>C, p.Asn91His in exon 3, in the *VCP* gene at the age of 47 years. By the age of 61 he was wheelchair bound and has developed scapular winging, cataracts, and a reduced respiratory function (FVC 2,9 litres, 79% predicted).

The patient's highest educational level was primary education, he worked as a chainsaw in the woods and had cardiovascular risk factors such as diabetes type 2, hypertension, and hypercholesterolemia.

Since the age of 60, he complained about slowly progressive problems in concentration, mild forgetfulness and orientation in time and place. In addition, his relatives complained both about the progressive memory deficits as well as agitation, irritability, and language problems. A neuropsychological evaluation, one year later, revealed signs of short-term and long-term auditory memory deficits, executive function deficits in the field of resource searching (verbal fluency) and auditory attention deficits. The linguistic functions in the field of speech production and understanding, the ability to read and the perception of complex visual material were preserved. He scored 22 in the Mini-mental state examination.

A brain MRI showed multiple, diffuse vascular changes in the white matter of both brain hemispheres (Fazekas 1) and slight widening of the choroid fissure bilaterally in the medial temporal lobe compatible with a medial temporal lobe atrophy score of one. A mild dementia syndrome was diagnosed and treatment with Donepezil was introduced.

By the age of 64.5 years, the patient turned bedridden and was completely dependent for the activities of daily living, mainly due to the muscle weakness, showing a Barthel index of 30/100.

At age 66 the patient died due to a myocardial infarction in the context of a hospital admission due to a severe SARS-CoV-2 pneumonia.

## Supplementary Materials and Methods

This is a multicentre international descriptive retrospective study collecting clinical and genetic data obtained on routine clinical care visits, from patients with a genetically confirmed diagnosis of MSP. Fifty-two centres from 24 countries participated in the study and contribute to the data collection.

In order to try to standardize variant interpretation, which was performed differently within individual countries, all variants were centrally reviewed by an experienced geneticist from the John Walton Muscular Dystrophy Centre using the criteria suggested in the American College of Medical and Genomic Genetics [28] as a guide. Variant nomenclature was based on transcript reference NM\_007216.3. Inclusion criteria were: (i) patients being heterozygous pathogenic (P)/likely pathogenic (LP) variant in the *VCP* gene and (ii) enough data available in the clinical notes to answer some of the following clinical questions: age of disease onset, genetic diagnosis and clinical progression, signs/symptoms at onset, clinical progression, ambulatory status and ancillary test results if performed. Patients carrying a pathogenic variant but who did not have any clinical symptoms of disease at last appointment are also described but not included in the analysis. Patients who harboured a variant of unknown significance (VUS) were included if disease causality was supported by *in silico* analysis and clinical judgment based on item (ii) of the inclusion criteria and/or the pedigree indicated a dominant disease. Once the clinical data was collected for all the patients and family history, the ACMG criteria of each variant were recalculated ([https://www.medschool.umaryland.edu/Genetic\\_Variant\\_Interpretation\\_Tool1.html/](https://www.medschool.umaryland.edu/Genetic_Variant_Interpretation_Tool1.html/)).

Study approval was obtained from the Newcastle upon Tyne Hospitals Register Audit, Newcastle, UK (project number 10833, Caldicott Approval: 7918). Institutional Review Boards approvals were obtained from the LMU Klinikum at Ludwig-Maximilians University in Munich, Germany (project 21-0071) and from the Washington University School of Medicine Institutional Review Board, USA (n° 201103416) and the Johns Hopkins Hospital Institutional Review Board, Baltimore, USA (n° 00288171). These ethics committees catalogued the present study as an audit as it was collecting deidentified retrospective data of patients with VCP. In these cases, there is no need for patients to sign a consent form.

### Data sources

Participating centres completed a survey for each of their patients. The following data were collected: age of disease onset, age at last assessment, age at genetic diagnosis, genetic mutation and type of variant (missense, nonsense, frame shift, aberrant splicing or other non-specified), effect of the variant identified on protein, presence and pattern of muscle weakness, cardiac and respiratory impairment, cognitive impairment described as clinically compatible with mixed cognitive impairment, Alzheimer disease or FTD, presence of extrapyramidal disorders (defined as the presence of resting and/or action tremor, rigidity and bradykinesia, dystonic postures and movements, apraxic movements -ideomotor, limb-kinetic-, and postural instability [29]), signs of upper motor and/or lower motor neuron involvement, presence of PDB, presence of polyneuropathy, ambulatory status and family history. Results of the following ancillary tests were collected if available: spirometry, electromyography and nerve conduction studies, echocardiography, muscle biopsy, muscle magnetic resonance imaging (MRI), serum creatine kinase (CK) and alkaline phosphatase values (ALP). The data on muscle biopsy and muscle magnetic resonance imaging will be fully reported in separate papers.

To evaluate disease progression, we calculated the median times from disease onset to ambulation with assistance (ambulation with a stick/cane), to wheelchair for outdoor and indoor

activities, or to being confined to bed. The age of loss of ambulation was defined as the age when patients required a full-time wheelchair for both outdoor and indoor activities.

Cardiac involvement was defined by a left ventricular ejection fraction lower than 55%, presence of morphological abnormalities in the ventricular walls as detected by echocardiography or the existence of cardiac conduction defects evaluated by an electrocardiogram.

A severe respiratory impairment was defined as a vital force capacity (FVC) less than 50% of predicted or by the use of assisted ventilation. The use of non-invasive or invasive ventilation assistance at last assessment was recorded as well as the age at which it was started.

In addition, the following disease landmarks in years were collected: age at genetic diagnosis (age at a genetic test confirming a variant in the VCP gene), time to genetic diagnostic (difference between the age at a genetic diagnosis and the age of disease onset), age at last clinical assessment (in years as noted in clinical records), time of disease progression (difference between the age at last clinical assessment or death and the age of disease onset), age of death (as recorded in clinical notes) and time to death (difference between the age of death and the age of disease onset).

### **Statistical analysis**

Quantitative variables were analysed using the Kolmogorov-Smirnov or Shapiro-Wilko tests to assess normal distribution. Data was expressed as number and percentage for categorical variables, and as mean  $\pm$  SD or as median and first and third interquartile and minimum and maximum for quantitative variables as appropriate. The Chi-squared or Fisher exact tests were used for the association between signs/symptoms and the four most frequent mutation types, with Bonferroni correction for multiple comparisons. Analysis of covariance, with adjustment for age at last assessment, was used to compare means of signs/symptoms onset among the four most frequent mutation types.

We performed a two-step analysis to select which variables were associated with being a full-time wheelchair user/confined to bed or death. First, a Chi-squared or Fisher exact test as appropriate was used for the association between signs/symptoms and each outcome. Pearson correlation was used to examine the correlations between the age of full-time wheelchair user/confined to bed or the age of death with the ages of the variables associated with those outcomes. Second, those variables that showed a significantly different distribution among groups (considered as  $p < 0.05$ ) were included in a binary logistic regression analysis (enter method). Following that, a Cox proportional hazard regression model (enter method) was performed to identify the variables associated with a risk of being a full-time wheelchair user/confined to bed or death. Finally, a Kaplan Meier survival analysis was carried to determine the time to being a full-time wheelchair user/confined to bed or death by the variables identified through the previous analysis. The level of significance allowed was  $p < 0.05$ . Statistics analysis was performed using SPSS software version 20 from IBM.

### **Data availability**

The data that support the findings of this study are available from the corresponding author, upon reasonable request.

**Supplementary Fig1. Phenotype's frequency reported in the families included in the study (n=186).**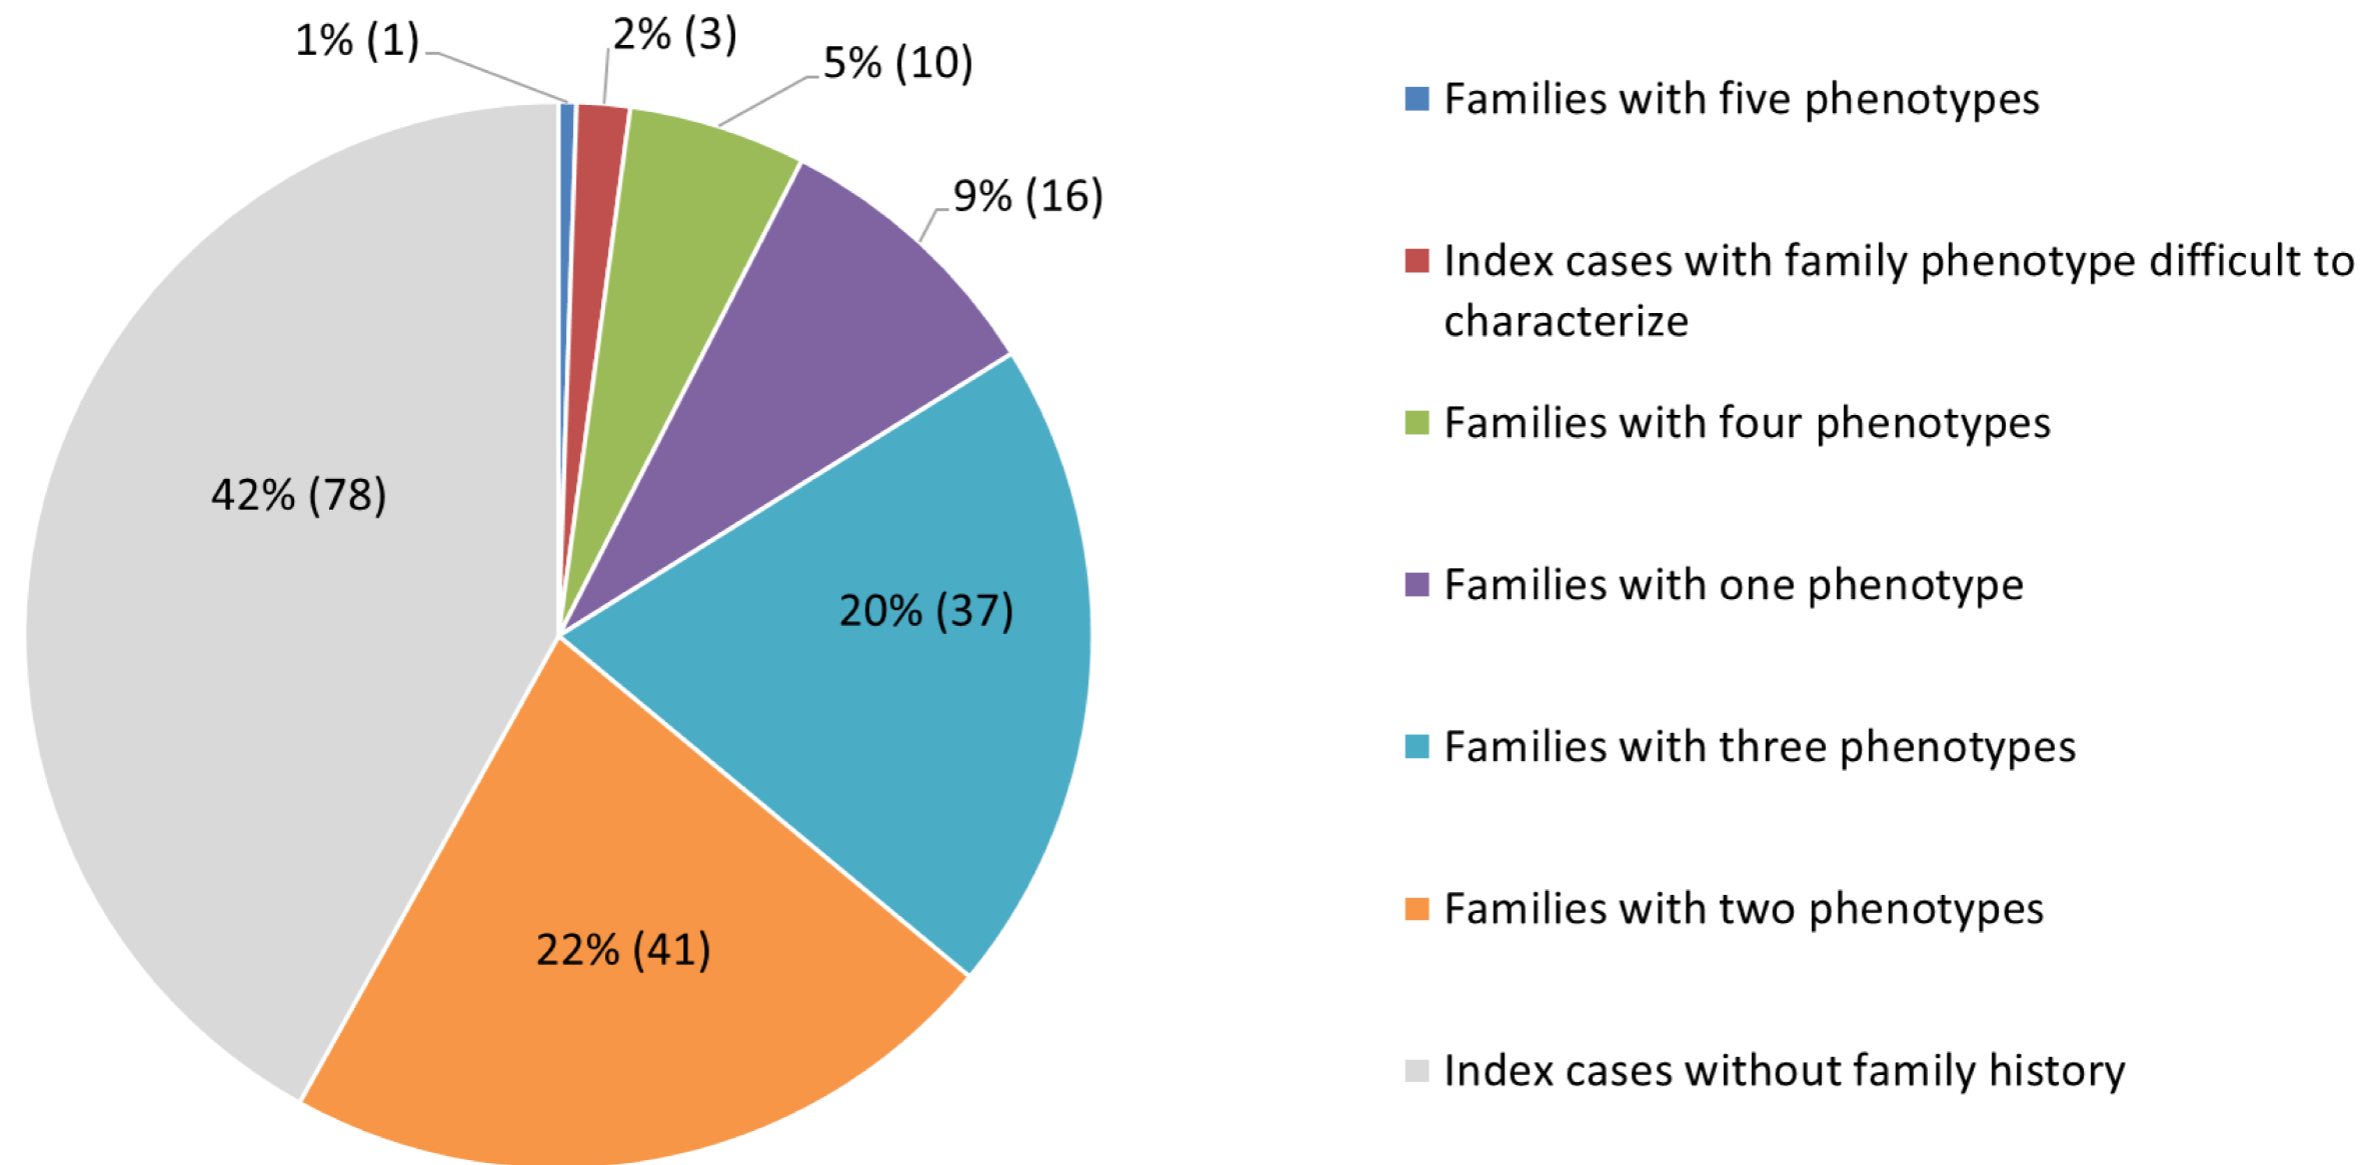

|                                                                          | Phenotype combinations                                                   | Frequency of families |
|--------------------------------------------------------------------------|--------------------------------------------------------------------------|-----------------------|
| <b>Families with one phenotype (n=16)</b>                                | IBM                                                                      | 12                    |
|                                                                          | ALS                                                                      | 2                     |
|                                                                          | LMN                                                                      | 1                     |
|                                                                          | FTD                                                                      | 1                     |
| <b>Families with two phenotypes (n=41)</b>                               | IBM and ALS                                                              | 11                    |
|                                                                          | IBM and FTD                                                              | 10                    |
|                                                                          | IBM and PDB                                                              | 5                     |
|                                                                          | FTD and ALS                                                              | 4                     |
|                                                                          | FTD and PNP                                                              | 3                     |
|                                                                          | IBM and extrapyramidal disorders                                         | 3                     |
|                                                                          | PNP and extrapyramidal disorders                                         | 1                     |
|                                                                          | IBM and PNP                                                              | 1                     |
|                                                                          | PDB and ALS                                                              | 1                     |
|                                                                          | IBM and spinocerebellar degeneration                                     | 1                     |
|                                                                          | IBM and spastic paraparesis                                              | 1                     |
| <b>Families with three phenotypes (n=37)</b>                             | FTD, PDB and IBM                                                         | 21                    |
|                                                                          | FTD, ALS and IBM                                                         | 8                     |
|                                                                          | FTD, PDB and ALS                                                         | 2                     |
|                                                                          | FTD, IBM and PNP                                                         | 1                     |
|                                                                          | PDB, IBM and PNP                                                         | 1                     |
|                                                                          | ALS, Huntington disease and FTD                                          | 1                     |
|                                                                          | FTD, extrapyramidal disorders and ALS                                    | 1                     |
|                                                                          | FTD, PDB and spastic paraparesis                                         | 1                     |
|                                                                          | FTD, extrapyramidal disorders and IBM                                    | 1                     |
|                                                                          | IBM, PDB, FTD and ALS                                                    | 6                     |
| <b>Families with four phenotypes (n=10)</b>                              | FTD, extrapyramidal disorders, PDB and IBM                               | 1                     |
|                                                                          | FTD, PDB, ALS and PNP                                                    | 1                     |
|                                                                          | FTD, PDB, ALS and Spastic paraplegia                                     | 1                     |
|                                                                          | FTD, extrapyramidal disorders, PDB and ALS                               | 1                     |
| <b>Families with five phenotypes (n=1)</b>                               | FTD, extrapyramidal disorders, PDB, IBM and ALS                          | 1                     |
| <b>Index cases with family phenotype difficult to characterize (n=3)</b> | The index case had IBM and gait disturbances were reported in the family | 3                     |

A total of 186 families were included in the study. The 42% (78/186) were index cases without family history and the 58% (108/186) were families in which the index cases and at least one relative were included in this study. The pie chart shows the frequency of families by number of phenotypes and the table below details the phenotypes combinations.

ALS = Amyotrophic Lateral Sclerosis; FTD= Fronto-Temporal Dementia; IBM= Inclusion Body Myopathy; LMN= Lower Motor Neurone Signs; PDB= Paget's Disease of the Bone

**Supplementary Table 1. Number of patients, families, and variants by country.**

| Country    | Patient frequency | Family frequency | Variants per-country | Most frequent variant           | Frequency of families in which the most frequent variant was identified |
|------------|-------------------|------------------|----------------------|---------------------------------|-------------------------------------------------------------------------|
| USA        | 47 (20.1%)        | 38 (20.4%)       | 17                   | c.464G>A                        | 17                                                                      |
| France     | 33 (14.1%)        | 23 (12.4%)       | 13                   | c.463C>T                        | 6                                                                       |
| UK         | 26 (11.1%)        | 20 (10.8%)       | 11                   | c.464G>A                        | 7                                                                       |
| Japan      | 25 (10.7%)        | 22 (11.8%)       | 14                   | c.277C>T                        | 4                                                                       |
| Spain      | 23 (9.8%)         | 19 (10.2%)       | 10                   | c.464G>A                        | 6                                                                       |
| Germany    | 15 (6.4%)         | 15 (8.1%)        | 6                    | c.464G>A                        | 9                                                                       |
| Italy      | 14 (6.0%)         | 10 (5.4%)        | 7                    | c.463C>T and c.277C>T           | 3 on each                                                               |
| Finlandia  | 10 (4.3%)         | 5 (2.7%)         | 4                    | c.410C>T                        | 2                                                                       |
| Brasil     | 9 (3.8%)          | 7 (3.8%)         | 6                    | c.464G>A                        | 2                                                                       |
| Belgium    | 7 (3.0%)          | 5 (2.7%)         | 4                    | c.476G>A                        | 2                                                                       |
| Netherland | 4 (1.7%)          | 3 (1.6%)         | 2                    | c.464G>A                        | 2                                                                       |
| Poland     | 3 (1.3%)          | 2 (1.1%)         | 2                    | c.1159A>C and c.271A>C          | 1 on each                                                               |
| Korea      | 3 (1.3%)          | 2 (1.1%)         | 2                    | c.463C>T and c.464G>A           | 1 on each                                                               |
| Chile      | 3 (1.3%)          | 3 (1.6%)         | 3                    | c.464G>A, c.464G>A and c.648A>G | 1 on each                                                               |
| Greece     | 2 (0.9%)          | 2 (1.1%)         | 1                    | c.476G>A                        | 1                                                                       |
| India      | 2 (0.9%)          | 2 (1.1%)         | 2                    | c.1988A>G and c.265C>G          | 1 on each                                                               |
| China      | 1 (0.4%)          | 1 (0.5%)         | 1                    | c.464G>A                        | 1                                                                       |
| Hungary    | 1 (0.4%)          | 1 (0.5%)         | 1                    | c.196G>A                        | 1                                                                       |
| Australia  | 1 (0.4%)          | 1 (0.5%)         | 1                    | c.464G>A                        | 1                                                                       |
| Scotland   | 1 (0.4%)          | 1 (0.5%)         | 1                    | c.1106T>C                       | 1                                                                       |
| Sweden     | 1 (0.4%)          | 1 (0.5%)         | 1                    | c.286C>G                        | 1                                                                       |
| Serbia     | 1 (0.4%)          | 1 (0.5%)         | 1                    | c.383G>C                        | 1                                                                       |
| Austria    | 1 (0.4%)          | 1 (0.5%)         | 1                    | c.476G>A                        | 1                                                                       |
| Canada     | 1 (0.4%)          | 1 (0.5%)         | 1                    | c.572G>A                        | 1                                                                       |
| Total      | 234 (100.0%)      | 186 (100.0%)     |                      |                                 |                                                                         |

Supplementary Table 2.1 List of variants in the *VCP* gene identified in the VCP international study.

| DNA variant         | Protein variant    | Exon                                 | Patient frequency | Family frequency | ACMG classification* | gnomAD     | ACGM evidence criteria              | ACGM re-classification**  |
|---------------------|--------------------|--------------------------------------|-------------------|------------------|----------------------|------------|-------------------------------------|---------------------------|
| c.464G>A            | p.Arg155His        | 5                                    | 67 (28.63%)       | 53               | P                    | absent     | PS4, PP5, PM1, PM2, PM5, PS3, PP1-M | Pathogenic                |
| c.463C>T            | p.Arg155Cys        | 5                                    | 26 (11.11%)       | 18               | P                    | absent     | PS3, PS4, PM1, PM2, PM5, PP1-M, PP3 | Pathogenic                |
| c.476G>A            | p.Arg159His        | 5                                    | 18 (7.69%)        | 17               | P                    | 2/251462   | PS4, PM1, PM2, PM5, PP1-M, PP3      | Pathogenic                |
| c.277C>T            | p.Arg93Cys         | 3                                    | 17 (7.26%)        | 14               | P                    | absent     | PS4, PM1, PM2, PM5, PP1-M, PP3, PP5 | Pathogenic                |
| c.572G>A            | p.Arg191Gln        | 5                                    | 13 (5.56%)        | 10               | P                    | 4/251484   | PS3, PS4, PM2, PM5, PP1-M, PP3, PP5 | Pathogenic                |
| c.475C>T            | p.Arg159Cys        | 5                                    | 9 (3.85%)         | 7                | P                    | 1/251438   | PS4, PM1, PM2, PP1-M, PP3, PP5, PM5 | Pathogenic                |
| c.410C>T            | p.Pro137Leu        | 4                                    | 7 (2.99%)         | 2                | P                    | absent     | PS3, PP1-M, PM5, PP3, PP5           | Pathogenic                |
| c.290G>A            | p.Gly97Glu         | 3                                    | 4 (1.71%)         | 2                | P                    | absent     | PS4, PM1, PM2, PP1-M, PP3, PP5      | Pathogenic                |
| c.374G>A            | p.Gly125Asp        | 4                                    | 4 (1.71%)         | 2                | VUS                  | absent     | PM2, PP1-M, PS4, PP3                | Likely pathogenic         |
| <b>c.648A&gt;G</b>  | <b>p.Ile216Met</b> | 6                                    | 4 (1.71%)         | 3                | VUS                  | absent     | PS4, PP1, PM2, PP3                  | Likely pathogenic         |
| <b>c.1106T&gt;C</b> | <b>p.Ile369Thr</b> | 10                                   | 3 (1.28%)         | 3                | VUS                  | absent     | PS4, PM2, PP3                       | Likely pathogenic         |
| c.1159A>C           | p.Asp387His        | 10                                   | 3 (1.28%)         | 2                | VUS                  | absent     | PS4, PM2, PP1, PP3                  | Likely pathogenic         |
| c.1160A>C           | p.Asn387Thr        | 10                                   | 3 (1.28%)         | 2                | VUS                  | 1/251492   | PS4, PM2, PP1, PP3                  | Likely pathogenic         |
| c.572G>C            | p.Arg191Pro        | 5                                    | 3 (1.28%)         | 2                | LP                   | absent     | PS4, PM2, PM5, PP3, PP5, PP1        | Pathogenic                |
| c.1160A>G           | p.Asn387Ser        | 10                                   | 2 (0.85%)         | 2                | VUS                  | absent     | PS4, PM2, PP3                       | Likely pathogenic         |
| c.1315G>C           | p.Ala439Pro        | 11                                   | 2 (0.85%)         | 1                | VUS                  | absent     | PS4, PM2, PP1, PP3                  | Likely pathogenic         |
| c.1315G>T           | p.Ala439Ser        | 11                                   | 2 (0.85%)         | 1                | VUS                  | absent     | PM2, PP1, PP3                       | VUS - not enough evidence |
| <b>c.268A&gt;G</b>  | <b>p.Asn90Asp</b>  | 3                                    | 2 (0.85%)         | 1                | LP                   | absent     | PP1, PM1, PM2, PP3                  | Likely pathogenic         |
| c.283C>T            | p.Arg95Cys         | 3                                    | 2 (0.85%)         | 2                | P                    | 1/251464   | PS3, PS4, PM1, PM2, PP1-M, PP3, PP5 | Pathogenic                |
| c.376A>T            | p.Ile126Phe        | 4                                    | 2 (0.85%)         | 2                | VUS                  | absent     | PM2, PP3, PS4                       | Likely pathogenic         |
| c.383G>C            | p.Gly128Ala        | 4                                    | 2 (0.85%)         | 2                | LP                   | absent     | PM2, PP3, PP5, PS4                  | Likely pathogenic         |
| c.383G>T            | p.Gly128Val        | 4                                    | 2 (0.85%)         | 2                | LP                   | absent     | PS4, PM2, PM5, PP3                  | Likely pathogenic         |
| c.451A>G            | p.Ile151Val        | 5                                    | 2 (0.85%)         | 2                | P                    | 1/31382    | PS3, PM1, PM2, PP3, PP5, PS4        | Pathogenic                |
| <b>c.722T&gt;G</b>  | <b>p.Ile241Ser</b> | 7                                    | 2 (0.85%)         | 2                | VUS                  | absent     | PS4, PM2, PP3                       | Likely pathogenic         |
| c.785C>G            | p.Thr262Ser        | 7                                    | 2 (0.85%)         | 1                | VUS                  | absent     | PP1, PM2, PP3, PS4                  | Likely pathogenic         |
| <b>c.1057A&gt;G</b> | <b>p.Ile353Val</b> | 9                                    | 1 (0.43%)         | 1                | VUS                  | absent     | PM2                                 | VUS - not enough evidence |
| <b>c.1105A&gt;T</b> | <b>p.Ile369Phe</b> | 10                                   | 1 (0.43%)         | 1                | VUS                  | absent     | PM2, PP3                            | VUS - not enough evidence |
| c.1696-3C>T         | p.(?)              | intron 13 of 16, position 509 of 511 | 1 (0.43%)         | 1                | LB                   | 10/249 922 | BS2                                 | VUS - not enough evidence |
| <b>c.196G&gt;A</b>  | <b>p.Glu66Lys</b>  | 3                                    | 1 (0.43%)         | 1                | VUS                  | absent     | PM2, PP3                            | VUS - not enough evidence |
| c.1984C>T           | p.Arg662Cys        | 14                                   | 1 (0.43%)         | 1                | VUS                  | 1/249512   | PS4, PM2, PP3                       | Likely pathogenic         |
| <b>c.1988A&gt;G</b> | <b>p.Lys663Arg</b> | 14                                   | 1 (0.43%)         | 1                | VUS                  | absent     | PM2, PP3                            | VUS - not enough evidence |
| c.2345G>C           | p.Gly782Ala        | 17                                   | 1 (0.43%)         | 1                | VUS                  | absent     | PM2                                 | VUS - not enough evidence |
| <b>c.265C&gt;G</b>  | <b>p.Arg89Gly</b>  | 3                                    | 1 (0.43%)         | 1                | LP                   | absent     | PM2, PM1, PP3                       | VUS - not enough evidence |
| c.259G>T            | p.Val87Phe         | 3                                    | 1 (0.43%)         | 1                | VUS                  | absent     | PP3, PM2                            | VUS - not enough evidence |
| c.266G>A            | p.Arg89Gln         | 3                                    | 1 (0.43%)         | 1                | LP                   | absent     | PM2, PP3, PM1                       | VUS - not enough evidence |
| c.271A>C            | p.Asn91His         | 3                                    | 1 (0.43%)         | 1                | P                    | absent     | PM1, PM2, PM5, PP3                  | Likely pathogenic         |
| c.271A>T            | p.Asn91Tyr         | 3                                    | 1 (0.43%)         | 1                | P                    | absent     | PM1, PM2, PP5, PP3                  | Likely pathogenic         |
| <b>c.286C&gt;G</b>  | <b>p.Leu96Val</b>  | 3                                    | 1 (0.43%)         | 1                | LP                   | absent     | PM1, PM2, PP3, PP5                  | Likely pathogenic         |

|                                    |                    |     |           |   |     |          |                         |                           |
|------------------------------------|--------------------|-----|-----------|---|-----|----------|-------------------------|---------------------------|
| <b>c.367G&gt;A</b>                 | <b>p.Val123Met</b> | 4   | 1 (0.43%) | 1 | VUS | absent   | PM2, PP3                | VUS - not enough evidence |
| c.376A>G                           | p.Ile126Val        | 4   | 1 (0.43%) | 1 | VUS | absent   | PM2, PP3                | VUS - not enough evidence |
| c.382G>T                           | p.Gly128Cys        | 4   | 1 (0.43%) | 1 | LP  | absent   | PM2, PM5, PP3           | VUS - not enough evidence |
| <b>c.431_432delG</b> <b>AinsAC</b> | <b>p.Arg144His</b> | 4   | 1 (0.43%) | 1 | VUS | absent   | PP3, PM2                | VUS - not enough evidence |
| c.463C>A                           | p.Arg155Ser        | 5   | 1 (0.43%) | 1 | P   | absent   | PM1, PM2, PM5, PP3, PP5 | Likely pathogenic         |
| <b>c.463C&gt;G</b>                 | <b>p.Arg155Gly</b> | 5   | 1 (0.43%) | 1 | P   | absent   | PM1, PM2, PM5, PP3      | Likely pathogenic         |
| c.464G>C                           | p.Arg155Pro        | 5   | 1 (0.43%) | 1 | P   | absent   | PM1, PM2, PM5, PP5, PP3 | Likely pathogenic         |
| c.469G>C                           | p.Gly157Arg        | 5   | 1 (0.43%) | 1 | P   | absent   | PM1, PM2, PP3, PP5      | Likely pathogenic         |
| c.472A>G                           | p.Met158Val        | 5   | 1 (0.43%) | 1 | P   | absent   | PM1, PM2, PM5, PP3, PP5 | Likely pathogenic         |
| <b>c.473T&gt;C</b>                 | <b>p.Met158Thr</b> | 5   | 1 (0.43%) | 1 | P   | absent   | PM1, PM2, PM5, PP3      | Likely pathogenic         |
| c.474G>T                           | p.Met158Ile        | 5   | 1 (0.43%) | 1 | P   | absent   | PM1, PM2, PM5, PP3, PP5 | Likely pathogenic         |
| c.478G>A                           | p.Ala160Thr        | 5   | 1 (0.43%) | 1 | P   | absent   | PM2, PM1, PP3           | VUS - not enough evidence |
| <b>c.490A&gt;C</b>                 | <b>p.Lys164Gln</b> | 5   | 1 (0.43%) | 1 | LP  | absent   | PM1, PM2, PP3           | VUS - not enough evidence |
| c.593T>G                           | p.Leu198Trp        | 6   | 1 (0.43%) | 1 | LP  | absent   | PM2, PP3, PP5           | VUS - not enough evidence |
| <b>c.625T&gt;G</b>                 | <b>p.Cys209Gly</b> | 6   | 1 (0.43%) | 1 | VUS | absent   | PM2, PP3                | VUS - not enough evidence |
| <b>c.697A&gt;G</b>                 | <b>p.Ile233Val</b> | 6   | 1 (0.43%) | 1 | VUS | 2/251480 | PM2                     | VUS - not enough evidence |
| c.784A>G                           | p.Thr262Ala        | 7   | 1 (0.43%) | 1 | VUS | absent   | PS4, PM2, PP3           | Likely pathogenic         |
| <b>c.80T&gt;C</b>                  | <b>p.Ile27Thr</b>  | 2   | 1 (0.43%) | 1 | VUS | absent   | PM2, PP3                | VUS - not enough evidence |
| c.-249C>T                          | n/a                | UTR | 1 (0.43%) | 1 | VUS | absent   | PM2,                    | VUS - not enough evidence |

\*As stated by Varsome, as of May 2022.

\*\*Calculated using all genetic data available for this study.

Novel or not previous clinically characterized variants are highlighted in bold.

Variants that have been upgraded from VUS to LP/P based on the ACGM re-classification are marked in light blue.

The number of patients in this table extends to 235 and the numbers of families to 187 because one extra patient is included. The extra patient, carrying variant c.697A>G, p.Ile233Val, was excluded from the final analysis due to not fulfilling the inclusion criteria but the variant is reported in this table for information purposes.



Supplementary Table 2.2 Clinical information of the VUS and novel variants identified in the VCP International Study.

| DNA m<br>(Protein m)       | Families | Patients |            |         |                           | Family History                                    | Family segregation |              |               |
|----------------------------|----------|----------|------------|---------|---------------------------|---------------------------------------------------|--------------------|--------------|---------------|
|                            |          | Sex      | ALA<br>(y) | AOO (y) | Phenotypes                |                                                   |                    |              |               |
| c.374G>A<br>(p.Gly125Asp)  | 1        | M        | 67         | 56      | IBM                       | ALS IBM                                           | Positive           |              |               |
|                            |          | M        | 79         | 70      | ALS                       |                                                   |                    |              |               |
|                            |          | F        | 61         | 58      | IBM                       |                                                   |                    |              |               |
| c.648A>G<br>(p.Ile216Met)  | 1        | M        | 57         | 42      | IBM FDT                   | D IBM                                             | Positive           |              |               |
|                            |          | M        | 55         | 45      | Mild cognitive impairment |                                                   |                    |              |               |
|                            |          | M        | 58         | 50      | IBM PNP                   |                                                   |                    |              |               |
| c.1106T>C<br>(p.Ile369Thr) | 1        | M        | 68         | 55      | IBM                       | AD                                                | Not available      |              |               |
|                            |          | F        | 71         | NA      | IBM PDB                   |                                                   |                    | D ALS        | Not available |
|                            |          | M        | 55         | 50      | IBM MND                   |                                                   |                    |              |               |
| c.1159A>C<br>(p.Asp387His) | 2        | M        | 66         | 60      | IBM                       | None                                              | Not available      |              |               |
|                            |          | M        | 39         | 37      | MND                       |                                                   |                    | None         | Not available |
|                            |          | M        | 46         | 44      | IBM                       |                                                   |                    |              |               |
| c.1160A>C<br>(p.Asn387Thr) | 1        | M        | 51         | 47      | IBM                       | D PDB M                                           | Positive           |              |               |
|                            |          | M        | 59         | 56      | ALS FTD PNP               |                                                   |                    | D PDB ALS PK | Positive      |
|                            |          | M        | 65         | 60      | ALS PDB FTD               |                                                   |                    |              |               |
| c.1160A>G<br>(p.Asn387Ser) | 2        | M        | 68         | 62      | IBM MND PDB FTD           | FDT                                               | Positive           |              |               |
|                            |          | M        | 61         | 54      | IBM                       |                                                   |                    | None         | Not available |
| c.1315G>C<br>(p.Ala439Pro) | 1        | F        | 82         | 68      | IBM                       | None                                              | Not available      |              |               |
|                            |          | M        | 43         | 40      | IBM FTD PDB               |                                                   |                    | D PDB M      | Positive      |
| c.1315G>T<br>(p.Ala439Ser) | 1        | F        | 49         | 46      | IBM + FDT isolated        | IBM PDB PNP                                       | Positive           |              |               |
|                            |          | M        | 67         | 53      | IBM PDB PNP               |                                                   |                    |              |               |
| c.268A>G<br>(p.Asn90Asp)   | 1        | M        | 70         | 62      | IBM                       | ALS                                               | Positive           |              |               |
|                            |          | F        | 39         | 26      | PDB ALS Squizofrenia      |                                                   |                    |              |               |
| c.376A>T<br>(p.Ile126Phe)  | 1        | F        | 44         | 35      | Dys PDB Squizorenia       | None                                              | Not available      |              |               |
|                            |          | M        | 53         | 48      | IBM                       |                                                   |                    |              |               |
| c.722T>G<br>(p.Ile241Ser)  | 1        | M        | 60         | 57      | IBM                       | Father with gait disturbances not further details | Not available      |              |               |
|                            |          | M        | 60         | 53      | IBM PDB                   |                                                   |                    | D ALS IBM    | Positive      |
| c.785C>G<br>(p.Thr262Ser)  | 1        | M        | 67         | 55      | MND                       | IBM                                               | Not available      |              |               |
|                            |          | M        | 63         | 59      | IBM                       |                                                   |                    | D            | Positive      |
| c.1057A>G<br>(p.Ile353Val) | 1        | M        | 67         | 62      | IBM                       | None                                              | Not available      |              |               |
|                            |          | M        | 67         | 64      | ALS                       |                                                   |                    |              |               |
| c.1105A>T<br>(p.Ile369Phe) | 1        | F        | 57         | 38      | IBM                       | IBM PK                                            | Positive           |              |               |
| c.196G>A<br>(p.Glu66Lys)   | 1        | M        | 56         | 51      | IBM FDT                   | None                                              | Not available      |              |               |
| c.1984C>T<br>(p.Arg662Cys) | 1        | M        | 72         | 56      | IBM FDT                   | None                                              | Not available      |              |               |
| c.1988A>G<br>(p.Lys663Arg) | 1        | M        | 39         | 37      | MND                       | None                                              | Not available      |              |               |

|                                                    |   |   |    |    |                     |                     |               |
|----------------------------------------------------|---|---|----|----|---------------------|---------------------|---------------|
| c.2345G>C<br>(p.Gly782Ala)                         | 1 | F | 44 | 42 | PNP                 | None                | Not available |
| <b>c.265 C&gt;G</b><br><b>(p.Arg89Gly)</b>         | 1 | M | 42 | 37 | MND                 | None                | Not available |
| c.259G>T<br>(p.Val87Phe)                           | 1 | M | 65 | 47 | IBM MND PNP DYS     | None                | Not available |
| <b>c.286C&gt;G</b><br><b>(p.Leu96Val)</b>          | 1 | M | 68 | 58 | IBM                 | None                | Not available |
| <b>c.367G&gt;A</b><br><b>(p.Val123Met)</b>         | 1 | M | 52 | 50 | IBM                 | PK                  | Not available |
| c.376A>G<br>(p.Ile126Val)                          | 1 | M | 73 | 71 | IBM FTD             | None                | Not available |
| <b>c.431_432delGAinsAC</b><br><b>(p.Arg144His)</b> | 1 | M | 60 | 46 | IBM DYS             | D ALS IBM           | Positive      |
| <b>c.463C&gt;G</b><br><b>(p.Arg155Gly)</b>         | 1 | F | 43 | 38 | IBM                 | None                | Not available |
| <b>c.473T&gt;C</b><br><b>(p.Met158Thr)</b>         | 1 | M | 52 | 44 | IBM PDB MND         | D PDB               | Not available |
| <b>c.490A&gt;C</b><br><b>(p.Lys164Gln)</b>         | 1 | M | 62 | 51 | IBM PDB             | Spastic paraparesis | Not available |
| <b>c.625T&gt;G</b><br><b>(p.Cys209Gly)</b>         | 1 | F | 50 | 38 | Spastic paraparesis | D PDB ALS           | Not available |
| <b>c.697A&gt;G</b><br><b>(p.Ile233Val)</b>         | 1 | M | NA | NA | PDB                 | Unknown             | Not available |
| c.784A>G<br>(p.Thr262Ala)                          | 1 | M | 63 | 50 | IBM PDB             | D PDB PK            | Positive      |
| <b>c.80T&gt;C</b><br><b>(p.Ile27Thr)</b>           | 1 | M | 63 | 52 | IBM FDT             | None                | Not available |
| c.-249C>T<br>n/a                                   | 1 | M | 61 | 38 | PNP DFT             | PK PNP              | Not available |

The table shows the patients that harboured a VUS, and novel or not previous clinically characterized variants at the moment of enrolment in the VCP study. The main patient phenotype, the phenotypes reported within their families and segregation analysis information is reported.

Novel or not previous clinically characterized variants are highlighted in bold

Abbreviations: ALA: age at last assessment. AOO: age of onset. D: Dementia. Dys: dysautonomia. FDT: Fronto temporal dementia. MND: Motor Neuron Disease. PDB: Paget Disease of the Bone. IBM: Inclusion Body Myopathy. AD: Alzheimer Disease. n/a: not available

**Supplementary Table 3. Patients ages at sign/ symptom development**

| Sign/ symptom                | Age data availability/<br>Patients with the sign or symptom | Mean (SD) [y] | Min - Max [y] |
|------------------------------|-------------------------------------------------------------|---------------|---------------|
| Proximal lower limb weakness | 179/207                                                     | 48.1± 09.7    | 18 - 77       |
| Proximal upper limb weakness | 152/181                                                     | 49.5± 10.2    | 18 - 77       |
| Distal lower limb weakness   | 122/166                                                     | 49.9± 09.0    | 24 - 72       |
| Distal upper limb weakness   | 98/139                                                      | 52.1± 09.2    | 30 - 77       |
| Axial weakness               | 71/106                                                      | 51.8± 10.3    | 30 - 80       |
| Scapular wigning             | 23/110                                                      | 51.2± 10.7    | 35 - 77       |
| Respiratory impairment       | 57/91                                                       | 54.1± 10.9    | 32 - 80       |
| PDB                          | 50/64                                                       | 48.7± 10.0    | 25 - 69       |
| Dysautonomia                 | 17/42                                                       | 52.2± 10.2    | 35 - 71       |
| LMN                          | 30/46                                                       | 48.5± 10.9    | 29 - 70       |
| Cramps                       | 31/42                                                       | 48.5± 10.4    | 25 - 70       |
| Dysphagia                    | 34/37                                                       | 55.7± 11.5    | 31 - 79       |
| Depression                   | 23/32                                                       | 53.7± 11.0    | 40 - 77       |
| PNP                          | 23/35                                                       | 52.0± 08.2    | 38 - 65       |
| FTD                          | 25/33                                                       | 58.0± 07.5    | 40 - 71       |
| UMN                          | 16/28                                                       | 50.4± 10.8    | 30 - 75       |
| Drop Head                    | 10/28                                                       | 53.7± 11.9    | 37 - 71       |
| Facial weakness              | 3/25                                                        | 45.3± 05.7    | 39 - 50       |
| Mix cognitive impairment     | 6/25                                                        | 49.7± 10.7    | 35 - 66       |
| Camptocormia                 | 4/17                                                        | 54.0± 07.6    | 46 - 61       |
| Dysarthria                   | 13/16                                                       | 51.9± 12.4    | 31 - 80       |
| Cardiac impairment           | 9/17                                                        | 49.7± 09.2    | 36 - 62       |
| Catarats                     | 9/14                                                        | 64.2± 10.8    | 41 - 79       |
| Extrapramidal disorders      | 5/8                                                         | 55.2± 06.8    | 48 - 66       |

PDB: Paget Disease of the Bone. LMN: Lower Motor Neuron signs. PNP: polyneuropathy. FTD: Fronto-Temporal Dementia. UMN: Upper Motor Neuron signs

**Supplementary Table 4. Frequency of signs/symptoms in the four most frequent variants.**

|                                                                                                                                                        | <b>c.464G&gt;A,<br/>p.Arg155His</b>   | <b>c.463C&gt;T,<br/>p.Arg155Cys</b>   | <b>c.476G&gt;A,<br/>p.Arg159His</b>   | <b>c.277C&gt;T,<br/>p.Arg93Cys</b>    |
|--------------------------------------------------------------------------------------------------------------------------------------------------------|---------------------------------------|---------------------------------------|---------------------------------------|---------------------------------------|
| N                                                                                                                                                      | 67                                    | 26                                    | 18                                    | 17                                    |
| Gender (male/female, %)                                                                                                                                | 42/25 (62.69%)                        | 11/15 (42.31%)                        | 16/2 (88.89%)                         | 12/5 (70.59%)                         |
| Frequency of families/ total relatives/families in which only the proband was included/ families in which the proband and other relative were included | 53/14/46/7                            | 18/8/13/5                             | 17/1/16/1                             | 14/3/11/3                             |
| Age of onset<br>(Number of patients with data available /total)<br>[mean, SD, minimum, maximum, median in years]                                       | 66/67<br>[42.6 ± 6.7,<br>29-56, 42.0] | 25/25<br>[37.8 ± 7.5,<br>22-54, 38.0] | 18/18<br>[50.8 ± 7.5,<br>35-65, 51.5] | 17/17<br>[52.3 ± 5.6,<br>41-63, 52.0] |
| Age at last assessment<br>(Number of patients with data available/total)<br>[mean, SD, minimum, maximum, median in years]                              | 67/67<br>[54.6 ± 7.9,<br>37-77, 54.0] | 26/26<br>[50.0 ± 6.3,<br>41-67, 49.5] | 18/18<br>[63.5 ± 9.2,<br>45-82, 63.0] | 17/17<br>[64.2 ± 5.3,<br>56-77, 64.0] |
| Time of disease progression<br>(Number of patients with reported data/total)<br>[mean, SD, minimum, maximum, median in years]                          | 66/67<br>[12.0 ± 6.8,<br>1-31, 11.0]  | 25/26<br>[12.3 ± 5.9,<br>5-26, 13.0]  | 18/18<br>[12.6 ± 7.5,<br>1-30, 11.5]  | 17/17<br>[11.7 ± 7.6,<br>2-28, 9.0]   |
| Alive                                                                                                                                                  | 48/60 (80.00%)                        | 17/23 (73.91%)                        | 11/15<br>(73.33%)                     | 9/10 (90.00%)                         |
| Age of death<br>(Number of patients death/ Number of patients with data available)<br>[mean, SD, minimum, maximum, median in years]                    | 12/12<br>[61.4 ± 7.0,<br>45-72, 63.3] | 6/6<br>[59.0 ± 7.7,<br>50-69, 56.0]   | 3/4<br>[69.8 ± 6.6,<br>63-76, 70.3]   | 1/1<br>[64.63]                        |
| Proximal upper limb weakness                                                                                                                           | 54/63 (85.71%)                        | 24/24 (100.00%)                       | 13/18<br>(72.22%)                     | 12/15 (80.00%)                        |
| Proximal lower limb weakness                                                                                                                           | 60/67 (89.55%)                        | 25/25 (100.00%)                       | 16/18<br>(88.89%)                     | 16/17 (94.12%)                        |
| Distal upper limb weakness                                                                                                                             | 37/63 (58.73%)                        | 21/25 (84.00%)                        | 11/18<br>(61.11%)                     | 11/15 (73.33%)                        |
| Distal lower limb weakness                                                                                                                             | 41/63 (65.08%)                        | 21/25 (84.00%)                        | 14/17<br>(82.35%)                     | 11/15 (73.33%)                        |
| Facial Weakness                                                                                                                                        | 7/60 (11.67%)                         | 2/24 (8.33%)                          | 2/18 (11.11%)                         | 1/15 (6.67%)                          |
| Camptocormia                                                                                                                                           | 28/59 (47.46%)                        | 19/24 (79.17%)                        | 8/18 (44.44%)                         | 4/15 (26.67%)                         |
| Drop Head                                                                                                                                              | 7/62 (11.29%)                         | 6/25 (24.00%)                         | 3/18 (16.67%)                         | 3/15 (20.00%)                         |
| Muscle Cramps                                                                                                                                          | 15/61 (24.59%)                        | 4/23 (17.39%)                         | 3/18 (16.67%)                         | 3/16 (18.75%)                         |
| Scapular Wigning                                                                                                                                       | 28/59 (47.46%)                        | 19/24 (79.17%)                        | 8/18 (44.44%)                         | 4/15 (26.67%)                         |
| Axial weakness                                                                                                                                         | 31/60 (51.67%)                        | 18/23 (78.26%)                        | 7/15 (46.67%)                         | 6/11 (54.55%)                         |
| Alzheimer disease                                                                                                                                      | 0/66 (0.00%)                          | 0/26 (0.00%)                          | 0/18 (0.00%)                          | 0/17 (0.00%)                          |
| Mixed cognitive impairment                                                                                                                             | 5/66 (7.58%)                          | 7/26 (26.92%)                         | 2/18 (11.11%)                         | 1/17 (5.88%)                          |
| FTD                                                                                                                                                    | 7/66 (10.61%)                         | 4/26 (15.38%)                         | 2/18 (11.11%)                         | 4/17 (23.53%)                         |
| PDB                                                                                                                                                    | 17/66 (25.76%)                        | 9/26 (34.62%)                         | 3/17 (17.65%)                         | 7/16 (43.75%)                         |
| Depression                                                                                                                                             | 12/55 (21.82%)                        | 5/26 (19.23%)                         | 1/16 (6.25%)                          | 2/15 (13.33%)                         |
| PNP                                                                                                                                                    | 9/66 (13.64%)                         | 4/26 (15.38%)                         | 1/18 (5.56%)                          | 5/17 (29.41%)                         |
| Dysphagia                                                                                                                                              | 11/62 (17.74%)                        | 5/25 (20.00%)                         | 1/18 (5.56%)                          | 3/15 (20.00%)                         |
| Dysarthria                                                                                                                                             | 6/61 (9.84%)                          | 3/24 (12.50%)                         | 0/18 (0.00%)                          | 0/14 (0.00%)                          |
| Dysautonomia                                                                                                                                           | 14/53 (26.42%)                        | 6/19 (31.58%)                         | 2/18 (11.11%)                         | 2/16 (12.50%)                         |
| UMN                                                                                                                                                    | 11/61 (18.03%)                        | 2/25 (8.00%)                          | 2/17 (11.76%)                         | 3/16 (18.75%)                         |
| LMN                                                                                                                                                    | 13/62 (20.97%)                        | 6/25 (24.00%)                         | 2/17 (11.76%)                         | 5/16 (31.25%)                         |
| Extrapyramidal disorders                                                                                                                               | 0/62 (0.00%)                          | 1/26 (3.85%)                          | 3/18 (16.67%)                         | 0/15 (0.00%)                          |
| Cataracts                                                                                                                                              | 3/49 (6.12%)                          | 1/24 (4.17%)                          | 2/17 (11.76%)                         | 2/15 (13.33%)                         |
| Cardiac impairment                                                                                                                                     | 7/67 (10.45%)                         | 1/26 (3.85%)                          | 0/18 (0.00%)                          | 1/17 (5.88%)                          |
| Dilated cardiomyopathy                                                                                                                                 | 2/67 (2.99%)                          | 0/26 (0.00%)                          | 0/18 (0.00%)                          | 1/17 (5.88%)                          |
| Hypertrophy cardiomyopathy                                                                                                                             | 2/67 (2.99%)                          | 0/26 (0.00%)                          | 0/18 (0.00%)                          | 0/17 (0.00%)                          |
| Respiratory symptoms                                                                                                                                   | 27/63 (42.86%)                        | 8/24 (33.33%)                         | 6/18 (33.33%)                         | 6/17 (35.29%)                         |
| Effort disnea                                                                                                                                          | 18/62 (66.67%)                        | 7/24 (87.50%)                         | 4/18 (66.67%)                         | 1/16 (6.67%)                          |
| Nocturnal Hipoventilation                                                                                                                              | 14/62 (51.85%)                        | 2/22 (25.00%)                         | 1/17 (16.67%)                         | 4/17 (66.67%)                         |
| Repeated respiratory infections                                                                                                                        | 3/63 (11.11%)                         | 1/24 (12.50%)                         | 1/18 (16.67%)                         | 1/16 (6.67%)                          |
| FVC < 80%                                                                                                                                              | 15/34 (55.56%)                        | 7/15 (87.50%)                         | 4/7 (66.67%)                          | 3/9 (50.00%)                          |
| FVC < 50%                                                                                                                                              | 4/34 (14.81%)                         | 5/15 (62.50%)                         | 0/7 (0.00%)                           | 0/9 (0.00%)                           |
| Part time NIV                                                                                                                                          | 0/66 (0.00%)                          | 0/26 (0.00%)                          | 0/18 (0.00%)                          | 0/17 (0.00%)                          |
| Full time NIV                                                                                                                                          | 0/66 (0.00%)                          | 0/26 (0.00%)                          | 0/18 (0.00%)                          | 0/17 (0.00%)                          |
| Walk independently                                                                                                                                     | 18/66 (27.27%)                        | 6/25 (24.00%)                         | 9/18 (50.00%)                         | 6/15 (40.00%)                         |
| Walk with aids                                                                                                                                         | 16/66 (24.24%)                        | 8/25 (32.00%)                         | 4/18 (22.22%)                         | 5/15 (33.33%)                         |
| Wheelchair outdoors user                                                                                                                               | 15/66 (22.73%)                        | 2/25 (8.00%)                          | 2/18 (11.11%)                         | 2/15 (13.33%)                         |
| Wheelchair outdoors and indoors user                                                                                                                   | 15/66 (22.73%)                        | 7/25 (28.00%)                         | 3/18 (16.67%)                         | 1/15 (6.67%)                          |
| Confined to bed                                                                                                                                        | 2/66 (3.03%)                          | 2/25 (8.00%)                          | 0/18 (0.00%)                          | 1/15 (6.67%)                          |

Order of data shown: frequency of patients with the sign/ symptom; frequency of patients with reported data; percentage of sign/symptom present.

FTD: Fronto-Temporal Dementia. LMN: lower motor neuron signs. UMN: upper motor neuron signs. NIV: non invasive ventilation. PDB: Paget Disease of the Bone. PNP: polyneuropathy.

**Supplementary Table 5: Correlation between age of sign/symptom onset with age of full-time wheelchair use/confined to bed.**

| <b>Pearson correlation</b>                       | <b>Age of full-time wheelchair use/confined to bed</b> |
|--------------------------------------------------|--------------------------------------------------------|
| Age at first symptoms (n=43)                     | 0.82*                                                  |
| Age of distal lower limb weakness onset (n=33)   | 0.82*                                                  |
| Age of proximal lower limb weakness onset (n=41) | 0.82*                                                  |
| Age of axial weakness onset (n=20)               | 0.81*                                                  |
| Age of dysautonomia onset (n=7)                  | 0.99*                                                  |
| Age of FTD onset (n=7)                           | 0.93*                                                  |
| Age of FVC<50% onset (n=9)                       | 0.94*                                                  |

\* p < 0.01  
Numbers in brackets represent patients in which both conditions were presented and data about age of onset were available.

**Supplementary Table 6. Binary logistic regression analysis for being a full-time wheelchair user or confined to bed.**

| Parameters                 | B      | Standard Error | Wald  | Degree of freedom | Sig. | Exp(B) | 95% C.I. for EXP(B) |         |
|----------------------------|--------|----------------|-------|-------------------|------|--------|---------------------|---------|
|                            |        |                |       |                   |      |        | Lower               | Upper   |
| FTD                        | -19.65 | 17819.73       | 0.00  | 1                 | 1.00 | 0.00   | 0.00                | .       |
| FVC $\geq$ 80%             |        |                | 5.75  | 4                 | 0.22 |        |                     |         |
| FVC less 50%               | 4.22   | 1.80           | 5.44  | 1                 | 0.02 | 68.19  | 1.97                | 2363.28 |
| FVC 50 – 59%               | 2.27   | 1.933          | 1.39  | 1                 | 0.24 | 9.76   | 0.22                | 431.35  |
| FVC 60 – 69%               | 3.55   | 1.77           | 4.03  | 1                 | 0.05 | 34.99  | 1.09                | 1125.84 |
| FVC 70 – 79%               | 3.34   | 2.08           | 2.56  | 1                 | 0.11 | 28.37  | 0.47                | 1702.85 |
| Age at first symptoms      | 0.06   | 0.06           | 1.07  | 1                 | 0.30 | 1.06   | 0.95                | 1.20    |
| Distal lower limb weakness | -2.46  | 1.60           | 2.34  | 1                 | 0.13 | 0.08   | 0.00                | 1.98    |
| Axial weakness             | -0.71  | 0.85           | 0.69  | 1                 | 0.40 | 0.49   | 0.09                | 2.60    |
| Dysautonomia               | 1.99   | 1.14           | 3.030 | 1                 | 0.08 | 7.32   | 0.78                | 69.04   |
| Constant                   | -27.74 | 16523.55       | 0.000 | 1                 | 1.00 | 0.00   |                     |         |

Method selection used in the model: Enter,  $p=0.04$ .

FTD: Fronto-Temporal Dementia. FVC: Vital Force Capacity.

**Supplementary Table 7. Cox regression analysis for being a full-time wheelchair user or confined to bed.**

| Parameters                 | B     | Standard Error | Wald | Degree of freedom | Sig. | Exp(B) | 95% C.I. for EXP(B) |       |
|----------------------------|-------|----------------|------|-------------------|------|--------|---------------------|-------|
|                            |       |                |      |                   |      |        | Lower               | Upper |
| FVC $\geq$ 80%             |       |                | 6.65 | 4                 | 0.16 |        |                     |       |
| FVC less 50%               | 1.83  | 0.76           | 5.85 | 1                 | 0.02 | 6.24   | 1.42                | 27.51 |
| FVC 50 – 59%               | 0.83  | 0.76           | 1.18 | 1                 | 0.28 | 2.29   | 0.52                | 10.17 |
| FVC 60 – 69%               | -0.19 | 1.12           | 0.03 | 1                 | 0.86 | 0.83   | 0.09                | 7.46  |
| FVC 70 – 79%               | 0.68  | 0.90           | 0.58 | 1                 | 0.45 | 1.98   | 0.34                | 11.52 |
| FTD                        | -0.76 | 1.24           | 0.38 | 1                 | 0.54 | 0.47   | 0.04                | 5.26  |
| Distal lower limb weakness | -1.00 | 0.82           | 1.48 | 1                 | 0.22 | 0.37   | 0.07                | 1.84  |
| Axial weakness             | -0.01 | 0.57           | 0.00 | 1                 | 0.99 | 0.99   | 0.33                | 3.01  |
| Dysautonomia               | -0.03 | 0.67           | 0.00 | 1                 | 0.96 | 0.97   | 0.26                | 3.56  |
| Age at first symptoms      | -0.03 | 0.04           | 0.49 | 1                 | 0.48 | 0.97   | 0.91                | 1.05  |

Method selection used in the model: Enter, Chi-square 20.05, p= 0.03.  
 FTD: Fronto-Temporal Dementia. FVC: Vital Force Capacity.

**Supplementary Table. 8: Correlation between age of sign/symptom onset with age of death.**

| <b>Pearson correlation</b>              | <b>Age of death</b> |
|-----------------------------------------|---------------------|
| Age at first symptoms (n=36)            | 0.71*               |
| Age of full-time wheelchair user (n=14) | 0.84*               |
| Age of FTD onset (n=8)                  | 0.95*               |
| Age FVC $\leq$ 70% (n=6)                | 0.94*               |
| Age dysphagia onset (n=10)              | 0.97*               |

\*p < 0.01  
Numbers in brackets represent patients in which both conditions were present and data about age of onset were available.



**Supplementary Table 9. Binary logistic regression analysis for death.**

| Parameters                           | B     | Standard Error | Wald  | Degree of freedom | Sig. | Exp(B) | 95% C.I. for EXP(B) |        |
|--------------------------------------|-------|----------------|-------|-------------------|------|--------|---------------------|--------|
|                                      |       |                |       |                   |      |        | Lower               | Upper  |
| FTD                                  | 1.08  | 0.92           | 1.39  | 1                 | 0.24 | 2.94   | 0.49                | 17.68  |
| FVC $\geq$ 80%                       |       |                | 6.12  | 4                 | 0.19 |        |                     |        |
| FVC less 50%                         | 2.53  | 1.24           | 4.15  | 1                 | 0.04 | 12.55  | 1.10                | 143.23 |
| FVC 50 – 59%                         | 1.62  | 1.32           | 1.51  | 1                 | 0.22 | 5.07   | 0.38                | 67.20  |
| FVC 60 – 69%                         | 2.89  | 1.25           | 5.32  | 1                 | 0.02 | 18.05  | 1.54                | 210.98 |
| FVC 70 – 79%                         | 2.16  | 1.25           | 3.01  | 1                 | 0.08 | 8.68   | 0.76                | 99.62  |
| Dysphagia                            | 0.25  | 0.84           | 0.09  | 1                 | 0.77 | 1.28   | 0.25                | 6.57   |
| Drop head                            | -0.39 | 0.95           | 0.17  | 1                 | 0.68 | 0.67   | 0.11                | 4.30   |
| Full time wheelchair/confined to bed | 1.88  | 0.88           | 4.62  | 1                 | 0.03 | 6.56   | 1.18                | 36.46  |
| Age at first symptoms                | 0.06  | 0.04           | 2.93  | 1                 | 0.09 | 1.06   | 0.99                | 1.14   |
| Constant                             | -7.22 | 2.10           | 11.82 | 1                 | 0.00 | 0.00   |                     |        |

Method selection used in the model: Enter, Chi-square 19.25, p= 0.04.  
 FTD: Fronto-Temporal Dementia. FVC: Vital Force Capacity.

**Supplementary Table 10. Cox regression analysis for variables associated with death.**

| Parameters                                | B     | Standard Error | Wald | Degree of freedom | Sig. | Exp(B) | 95% C.I. for EXP(B) |        |
|-------------------------------------------|-------|----------------|------|-------------------|------|--------|---------------------|--------|
|                                           |       |                |      |                   |      |        | Lower               | Upper  |
| FVC $\geq$ 80%                            |       |                | 7.11 | 4                 | 0.13 |        |                     |        |
| FVC less 50%                              | 3.51  | 1.45           | 5.85 | 1                 | 0.02 | 33.29  | 1.94                | 570.65 |
| FVC 50 – 59%                              | 2.46  | 1.48           | 2.76 | 1                 | 0.10 | 11.74  | 0.64                | 214.44 |
| FVC 60 – 69%                              | 2.99  | 1.31           | 5.20 | 1                 | 0.02 | 19.91  | 1.52                | 260.73 |
| FVC 70 – 79%                              | 1.68  | 1.40           | 1.43 | 1                 | 0.23 | 5.34   | 0.34                | 82.77  |
| FTD                                       | 2.28  | 0.86           | 7.08 | 1                 | 0.01 | 9.76   | 1.82                | 52.29  |
| Age at first symptoms                     | 0.08  | 0.03           | 6.92 | 1                 | 0.01 | 1.08   | 1.02                | 1.14   |
| Dysphagia                                 | 1.43  | 0.91           | 2.44 | 1                 | 0.12 | 4.16   | 0.70                | 24.90  |
| Drop head                                 | -1.90 | 1.10           | 2.96 | 1                 | 0.09 | 0.15   | 0.02                | 1.30   |
| Full time wheelchair user/confined to bed | 0.31  | 0.87           | 0.13 | 1                 | 0.72 | 1.36   | 0.25                | 7.57   |

Method selection used in the model: Enter, Chi-square 25.30, p= 0.003.  
 FTD: Fronto-Temporal Dementia. FVC: Vital Force Capacity.
